# Supplementary material
Source: MDPI journal article supplement (https://www.mdpi.com/2071-1050/10/9/3176)
Supplement: s1 [file s1]

**Supplementary 1: Municipalities included in Sierra Cabrera-Bédar SAC**

| <b>Municipality</b>     | <b>SAC Area by Municipality (%)</b> | <b>Municipality Area in SAC (%)</b> |
|-------------------------|-------------------------------------|-------------------------------------|
| Bédar                   | 9.9                                 | 71.4                                |
| Los Gallardos           | 3.5                                 | 33.7                                |
| Lubrín                  | 5.8                                 | 14.2                                |
| Lucainena de las Torres | 9.4                                 | 25.7                                |
| Mojácar                 | 11.9                                | 56.3                                |
| Sorbas                  | 34.5                                | 46.6                                |
| Turre                   | 25.0                                | 78.0                                |

## Supplementary 2: Social and economic effects of the Special Area of Conservation of Sierra de Cabrera-Bédar. Online questionnaire

### Introduction

Welcome to the SOSTPARK Project

The SOSTPARK Project is led by the Spanish National Research Council. It forms part of the Spanish Plan of Research, Development and Innovation 2013-2016. It seeks to assess the effect of the designation of different protected areas categories on the Spanish society and economy in order to minimise their costs and maximise their benefits. The results of the survey will be shown to relevant stakeholders to improve the territorial sustainability of protected areas.

The following survey is anonymous and non-commercial. Its results will not be transferred to third parties and will exclusively be used for research purposes.

We would very much appreciate it if you could devote 15 minutes to respond to the seven questions of this survey, providing the stance of your organisation on the Special Area of Conservation of Sierra de Cabrera-Bédar.

There are no correct or incorrect answers. The key is that the stance of your organisation is represented. As a result, it can be filled in collaboration with colleagues.

Please, respond to the survey by the 20<sup>th</sup> of June. Question 1 to 6 should be replied to entirely whereas question 7 is optional.

If you have any query regarding the survey or the SOSTPARK project, you can email us at: david.rodriguez@csic.es; javier.martinez@cchs.csic.es

Your cooperation is extremely important to our research. Thus, we appreciate it very much your effort to fill it in.

With our warmest regards and deepest acknowledgement.

Dr. David Rodríguez Rodríguez (IEGD-CSIC & ETC-UMA)

Dr. Javier Martínez Vega (IEGD-CSIC)

### Survey

Your organisation

1. Please, state the name of your organisation (enterprise or entity)
2. Please, specify the number of people represented by your organisation:
  - From 1 to 9 workers / members
  - From 10 to 49 workers / members
  - From 50 to 250 workers / members
  - More than 250 workers / members
  - Other (please specify):

Effects of protected areas on the municipalities where they are designated

A Special Area of Conservation is a site designated by law to protect nature (flora, fauna and ecosystems), landscape, geology, water, and other natural resources. Special Areas of Conservation

restrict some environmentally impacting activities (e.g., construction), while allowing other activities, such as scientific research, tourism (without strict control of visitors), environmental education, or farming and forestry, with some limitations.

**Response options** (the percentages shown in the response options try to estimate the change in value of different local social and economic aspects (e.g., employment), between Before and After the designation of the Special Area of Conservation of Sierra Cabrera-Bédar, although they are just informative.

- *Large decrease*: Decrease of -10% or more of the value of the assessed aspect (e.g. local employment) since the designation date of the Special Area of Conservation of Sierra de Cabrera-Bédar (January of 2015).
- *Moderate decrease*: Decrease of between -3% and -10% or more of the value of the assessed aspect (e.g. local employment) since the designation date of the Special Area of Conservation of Sierra de Cabrera-Bédar (January of 2015).
- *No effect*: Les than 3% increase or decrease of the value of the assessed aspect (e.g. local employment) since the designation date of the Special Area of Conservation of Sierra de Cabrera-Bédar (January of 2015).
- *Moderate increase*: Increase of between 3% and 10% or more of the value of the assessed aspect (e.g. local employment) since the designation date of the Special Area of Conservation of Sierra de Cabrera-Bédar (January of 2015).
- *Large increase*: Increase of 10% or more of the value of the assessed aspect (e.g. local employment) since the designation date of the Special Area of Conservation of Sierra de Cabrera-Bédar (January of 2015).

3. According to your organisation, how did the designation of the Special Area of Conservation of Sierra Cabrera-Bédar affect each of the following social aspects (e.g. number of residents) in the municipalities where it was designated, such as Bédar or Turre?

|                                                                           | Large decrease | Moderate decrease | No effect | Moderate increase | Large increase | DK / NA |
|---------------------------------------------------------------------------|----------------|-------------------|-----------|-------------------|----------------|---------|
| Number of residents                                                       |                |                   |           |                   |                |         |
| Age of residents                                                          |                |                   |           |                   |                |         |
| Education level of residents (primary, secondary or university education) |                |                   |           |                   |                |         |
| Number of local education infrastructures (schools, institutes,           |                |                   |           |                   |                |         |

|                                                                                                                 |  |  |  |  |  |  |
|-----------------------------------------------------------------------------------------------------------------|--|--|--|--|--|--|
| skill training centres)                                                                                         |  |  |  |  |  |  |
| Environmental awareness of residents                                                                            |  |  |  |  |  |  |
| Local cultural, recreational and sport offer (libraries, cinemas, theatres, sport fields, swimming pools, etc.) |  |  |  |  |  |  |
| Local traditions                                                                                                |  |  |  |  |  |  |
| Health of residents                                                                                             |  |  |  |  |  |  |
| Number of local health infrastructures (pharmacies, clinics, hospitals)                                         |  |  |  |  |  |  |
| Number of offences and sanctions (for instance, related to flora, fauna, water, soil, forest fires, etc.)       |  |  |  |  |  |  |
| Restriction of local property rights (expropriations, closed seasons, prohibitions, etc.)                       |  |  |  |  |  |  |
| Vulnerability of local populations to natural catastrophes (torrential rain, strong winds, etc.)                |  |  |  |  |  |  |
| Number of local security and justice infrastructures (police stations, courts, etc.)                            |  |  |  |  |  |  |
| Resident participation in local                                                                                 |  |  |  |  |  |  |

|                                                 |  |  |  |  |  |  |
|-------------------------------------------------|--|--|--|--|--|--|
| environmental decisions                         |  |  |  |  |  |  |
| Number of local (non-commercial) associations   |  |  |  |  |  |  |
| Research or technical activities in/on the site |  |  |  |  |  |  |

Do you think we forgot any relevant social aspect? Please, say which one:

4. According to your organisation, how did the designation of the Special Area of Conservation of Sierra Cabrera-Bédar affect each of the following economic aspects (e.g. local quality of life) in the municipalities where it was designated, such as Bédar or Turre?

|                                                                        | Large decrease | Moderate decrease | No effect | Moderate increase | Large increase | DK / NA |
|------------------------------------------------------------------------|----------------|-------------------|-----------|-------------------|----------------|---------|
| Local quality of life                                                  |                |                   |           |                   |                |         |
| Price of local products and services                                   |                |                   |           |                   |                |         |
| Residents' income                                                      |                |                   |           |                   |                |         |
| Town council's budget                                                  |                |                   |           |                   |                |         |
| Local administrative procedures                                        |                |                   |           |                   |                |         |
| Local taxes                                                            |                |                   |           |                   |                |         |
| Local employment                                                       |                |                   |           |                   |                |         |
| Number of local businesses and enterprises                             |                |                   |           |                   |                |         |
| Housing construction                                                   |                |                   |           |                   |                |         |
| Number of local transport infrastructure (ports, bridges, roads, etc.) |                |                   |           |                   |                |         |
| Number of local technological equipments and                           |                |                   |           |                   |                |         |

|                                                                                                         |  |  |  |  |  |  |
|---------------------------------------------------------------------------------------------------------|--|--|--|--|--|--|
| infrastructures<br>(phone lines,<br>internet<br>connections, etc.)                                      |  |  |  |  |  |  |
| Local tourist activity<br>(number of visitors,<br>number of tourist<br>and accommodation<br>facilities) |  |  |  |  |  |  |

Do you think we forgot any relevant economic aspect? Please, say which one:

Comments to the survey (optional)

5. Please, let us know how we can improve the survey:

Thank you very much for your collaboration

### Supplementary 3: Literature review

- Alló, M., M. Barrio, and M. Loureiro. 2010. Impactos socioeconómicos de la red de parques nacionales: Una aproximación al Parque Nacional de las Islas Atlánticas. *Ecosistemas* 19(2).
- Blicharska, M., E.H. Orlikowska, J.M. Roberge, and M. Grodzinska-Jurczak. 2016. Contribution of social science to large scale biodiversity conservation: A review of research about the Natura 2000 network. *Biological Conservation* 199: 110-122.
- CBD, Convention on Biological Diversity. 2010. *Strategic Plan 2011-2020. Aichi Biodiversity Targets*. <http://www.cbd.int/sp/targets/>
- INE, Instituto Nacional de Estadística. 2016. *Anuario Estadístico de España 2016*. [http://www.ine.es/prodyser/pubweb/anuarios\\_mnu.htm](http://www.ine.es/prodyser/pubweb/anuarios_mnu.htm)
- Järv, H., J. Kliimask, R. Ward, and K. Sepp. 2016. Socioeconomic impacts of protection on residents of national parks. *European Countryside* 8(2): 67-85.
- OAPN, Organismo Autónomo Parques Nacionales. 2017. *Tercer Informe de Situación de la Red de Parques Nacionales 2011-2013. I Estado de la Red*. Madrid: Ministerio de Agricultura, Alimentación y Medio Ambiente. [http://www.mapama.gob.es/es/red-parques-nacionales/divulgacion/tomo1-informe-estado-red-2011-2013\\_tcm30-380418.pdf](http://www.mapama.gob.es/es/red-parques-nacionales/divulgacion/tomo1-informe-estado-red-2011-2013_tcm30-380418.pdf)
- Pomeroy, R.S., J.E. Parks, and L.M. Watson. 2004. How is your MPA doing? A Guidebook of Natural and Social Indicators for Evaluating Marine Protected Area Management Effectiveness. Gland and Cambridge: IUCN.
- Rodríguez-Rodríguez, D., S.E. Rees, L.D. Rodwell, and M.J. Attrill. 2015a. Assessing the socioeconomic effects of multiple-use MPAs in a European setting: A national stakeholders' perspective. *Environmental Science and Policy* 48, 115-127.
- Shields, B.P., S.A. Moore, and Eagles, P.F.J. 2016. Indicators for assessing good governance of protected areas: insights from park managers in Western Australia. *PARKS* 22.1: 37-50.
- Schreckenber, K., I. Camargo, K. Withnall, C. Corrigan, P. Franks, D. Roe, L.M. Scherl, and V. Richardson. 2010. *Social assessment of conservation initiatives. A review of rapid methodologies*. Natural Resource Issue, Nº 22. London: IIED. <http://pubs.iied.org/pdfs/14589IIED.pdf>

**Supplementary 4: Local organisations identified for the survey**

| Sector                               | Guild                                 | Local scale                                     |
|--------------------------------------|---------------------------------------|-------------------------------------------------|
| Secondary                            | Extractive industry                   | Transportes y Áridos El Cano S.l.               |
|                                      |                                       | Manufacturing                                   |
|                                      | Construction                          | Carpinteria Bedarmadera Sl                      |
|                                      |                                       | Quesos Sierra de Bédar*                         |
|                                      |                                       | Muebles Nuñez y Mobiliario Sl                   |
|                                      |                                       | Cervantes Gordon S.L.                           |
|                                      |                                       | Construcciones Colinas De Turre S.L.            |
|                                      |                                       | Construcciones y Reformas Indalo Sl*            |
|                                      | Reformas y Construcciones El Coco S.L |                                                 |
| Construcciones Stephen John Reed Sl. |                                       |                                                 |
| Energy production & distribution     | Reyesgar Sociedad Limitada            |                                                 |
| Tertiary                             | Transport                             | Terra Clara Sociedad Limitada.                  |
|                                      | Hospitality                           | Restaurante El Pastor                           |
|                                      |                                       | Sansil Restauradores Sl.                        |
|                                      |                                       | Miramar                                         |
|                                      |                                       | El Pinar                                        |
|                                      | Real-estate                           | Linnitt Property Management Services S.L        |
|                                      |                                       | Mojacar Estates                                 |
|                                      |                                       | Arimet 1970*                                    |
|                                      |                                       | Jjr Developments Sl                             |
|                                      | Tour operating                        | Indalo-tren Sl                                  |
|                                      | Recreation                            | Cortijo Grande Golf & Resort                    |
|                                      |                                       | Extreme Adventure Mojacar Sl                    |
|                                      | Legal representation                  | Asesoria Juan Valero Gonzalez Sociedad Limitada |
|                                      |                                       | Gabinete Juridico y Empresarial del Levante Sl  |
|                                      |                                       | Defensoris Sociedad Limitada                    |
| Quaternary                           | Arts                                  | Asociación Amigos de El Argar                   |
|                                      |                                       | El faro de Bedar Museo                          |
|                                      |                                       | Centro de Arte Bédar                            |
| Institutional                        | Surveillance                          | SEPRONA Almería*                                |
|                                      | Local government                      | Ayuntamiento de Bédar                           |
|                                      |                                       | Ayuntamiento de Turre*                          |
| Miscellaneous                        | Environmental NGO                     | Bédar Sostenible*                               |

\*Organisations completing the survey



## Supplementary 5: Relative change by sustainability dimension and period

| Sustainability dimension | Category                     | Indicator                                       | Data availability       | Period    | Change Cases | Change Controls |       |
|--------------------------|------------------------------|-------------------------------------------------|-------------------------|-----------|--------------|-----------------|-------|
| Environmental            | Soil conservation            | Territory with high or very soil erosion        | 1996-2014               | SCI       | -81.99       | -63.58          |       |
|                          |                              | Land development                                | 1991-2007               | SCI       | 156.62       | 115.65          |       |
|                          | Environmental performance    | Per head urban waste production                 | 2006-2013               | SCI       | -3.20        | -4.58           |       |
|                          |                              | Per head water consumption in winter            | 2000-2014               | SCI       | -2.94        | 22.79           |       |
|                          |                              | Per head electricity consumption                | 2006-2016               | SCI       | -0.21        | -1.28           |       |
|                          |                              |                                                 |                         | SAC       | -6.25        | 0.68            |       |
|                          |                              | Gasoil propelled cars                           | 1997-2016               | SCI       | 41.13        | 57.68           |       |
|                          |                              |                                                 |                         | SAC       | 11.83        | 15.41           |       |
| Social                   | Demography                   | Population density                              | 1996-2017               | SCI       | 53.28        | 7.26            |       |
|                          |                              |                                                 |                         | SAC       | -9.63        | -8.29           |       |
|                          |                              | Population over 44 years old                    | 1996-2017               | SCI       | 13.26        | 9.28            |       |
|                          |                              |                                                 |                         | SAC       | 3.09         | 9.45            |       |
|                          |                              | Proportion of immigrants                        | 1996-2016               | SCI       | -5.20        | -2.26           |       |
|                          |                              |                                                 |                         | SAC       | 6.85         | -16.36          |       |
|                          |                              | Proportion of emigrants                         | 1996-2016               | SCI       | 41.04        | 53.36           |       |
|                          |                              |                                                 |                         | SAC       | 161.65       | 10.97           |       |
|                          |                              | Proportion of foreigners                        | 1996-2016               | SCI       | 120.36       | 382.69          |       |
|                          |                              |                                                 |                         | SAC       | -11.98       | -13.20          |       |
|                          |                              | Proportion of under 45 year old women           | 1996-2017               | SCI       | -15.66       | -6.22           |       |
|                          |                              |                                                 |                         | SAC       | -6.32        | -5.63           |       |
|                          |                              | Culture and leisure facilities                  | Public learning centres | 2006-2016 | SCI          | 29.17           | 37.50 |
|                          |                              |                                                 |                         |           | SAC          | 7.89            | 3.33  |
|                          | Public libraries             |                                                 | 2004-2015               | SCI       | 0.00         | -37.50          |       |
|                          |                              |                                                 |                         | SAC       | 0.00         | -50.00          |       |
|                          | Cinemas                      |                                                 | 2000-2017               | SCI       | 0.00         | 0.00            |       |
|                          |                              |                                                 |                         | SAC       | 0.00         | 0.00            |       |
|                          | Internet connections         |                                                 | 1996-2013               | SCI       | 714.93       | 587.74          |       |
|                          | Health and social facilities |                                                 | Mortality               | 1999-2013 | SCI          | -15.86          | 15.65 |
|                          |                              | Public health centres                           | 1992-2016               | SCI       | 12.25        | 51.14           |       |
|                          |                              |                                                 |                         | SAC       | 30.00        | 0.00            |       |
|                          |                              | Pharmacies                                      | 2009-2016               | SAC       | 0.00         | 0.00            |       |
|                          |                              | Places in retirement homes                      | 2005-2014               | SCI       | 0.00         | >0              |       |
|                          |                              | Places in kindergartens                         | 2005-2014               | SCI       | >0           | >0              |       |
|                          | Infrastructures              | Good conservation status of streets and squares | 2005-2014               | SCI       | 30.24        | 21.10           |       |

|             |                                          |                                     |           |        |        |        |
|-------------|------------------------------------------|-------------------------------------|-----------|--------|--------|--------|
|             |                                          | Public transport vehicles           | 2006-2017 | SCI    | 0.00   | 0.00   |
|             |                                          |                                     |           | SAC    | -16.67 | -25.00 |
|             | Environmental facilities                 | Per head selective waste containers | 2005-2014 | SCI    | 30.79  | -5.44  |
| Economic    | Standard of living and living conditions | Per head net declared income        | 1996-2015 | SCI    | 31.43  | 35.26  |
|             |                                          |                                     |           | SAC    | 22.52  | 1.71   |
|             |                                          | Local council's budget surplus      | 1998-2016 | SCI    | -61.83 | >0     |
|             |                                          |                                     |           | SAC    | 70.91  | 63.71  |
|             |                                          | Per head local council's income     | 1998-2016 | SCI    | 82.48  | 37.20  |
|             |                                          |                                     |           | SAC    | -10.20 | -0.31  |
|             | Per head local council's investment      | 1998-2016                           | SCI       | 68.86  | 28.49  |        |
|             |                                          |                                     | SAC       | -17.58 | -2.86  |        |
|             | Employment                               | Unemployment                        | 2006-2017 | SCI    | 135.72 | 128.32 |
|             |                                          |                                     |           | SAC    | 21.95  | 8.54   |
|             |                                          | Unemployment in construction        | 2009-2017 | SAC    | -59.39 | -50.08 |
|             | Enterprises and businesses               | Credit establishments               | 1999-2017 | SCI    | >0     | -3.85  |
|             |                                          |                                     |           | SAC    | 3.33   | -33.33 |
|             |                                          | Enterprises                         | 2007-2016 | SAC    | -13.56 | -10.05 |
|             |                                          | Construction enterprises            | 2007-2016 | SAC    | -30.58 | -38.06 |
|             |                                          | Hospitality enterprises             | 2007-2016 | SAC    | 5.55   | 0.52   |
|             |                                          | New construction enterprises        | 2009-2017 | SAC    | 75.00  | 76.47  |
|             |                                          | New service enterprises             | 2009-2017 | SAC    | 2.94   | 8.89   |
|             |                                          | Establishments                      | 2007-2016 | SAC    | -6.13  | -5.85  |
|             | Cooperatives                             | 2000-2014                           | SCI       | >0     | -6.25  |        |
|             | Services                                 | Beds in hotels                      | 1996-2016 | SCI    | -4.49  | 10.94  |
|             |                                          |                                     |           | SAC    | 35.11  | 10.61  |
|             |                                          | Beds in apartments                  | 1996-2016 | SCI    | 0.00   | 0.00   |
|             |                                          |                                     |           | SAC    | 0.00   | 0.00   |
|             |                                          | Camp places                         | 1996-2016 | SCI    | 0.00   | 0.00   |
|             |                                          |                                     |           | SAC    | 0.00   | 0.00   |
|             |                                          | Beds in rural guest houses          | 2000-2016 | SCI    |        | 0.00   |
| SAC         |                                          |                                     |           | 42.73  | 0.00   |        |
| Restaurants |                                          | 1996-2009                           | SCI       | 19.18  | 116.67 |        |
